# Supplementary material for: Antioxidant Activities of Dihydromyricetin Derivatives with Different Acyl Donor Chain Lengths Synthetized by Lipozyme TL IM
Source: MDPI journal article supplement (doi:10.3390/foods12101986), 2023-05-14
Supplement: s1 [file s1]

## Supplementary material

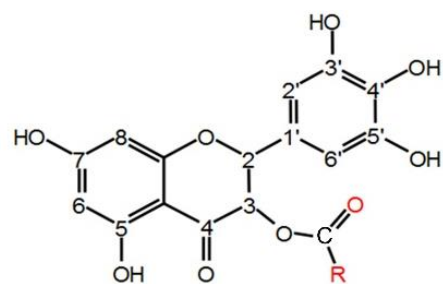

| R                                                | Compound                           |
|--------------------------------------------------|------------------------------------|
| CH <sub>3</sub>                                  | 3- <i>O</i> -acetyl-DHM (C2-DHM)   |
| (CH <sub>2</sub> ) <sub>2</sub> CH <sub>3</sub>  | 3- <i>O</i> -butyryl-DHM (C4-DHM)  |
| (CH <sub>2</sub> ) <sub>4</sub> CH <sub>3</sub>  | 3- <i>O</i> -hexanoyl-DHM (C6-DHM) |
| (CH <sub>2</sub> ) <sub>6</sub> CH <sub>3</sub>  | 3- <i>O</i> -octanoyl-DHM (C8-DHM) |
| (CH <sub>2</sub> ) <sub>10</sub> CH <sub>3</sub> | 3- <i>O</i> -lauroyl-DHM (C12-DHM) |

**Figure S1.** Structures of the acylated DHM derivatives.
